# Supplementary material for: FRQ-CK1 interaction determines the period of circadian rhythms in Neurospora
Source: PubMed Central journal article supplement (PMC6761100; doi:10.1038/s41467-019-12239-w), 2019-09-25
Supplement: 41467_2019_12239_MOESM1_ESM.pdf [file 41467_2019_12239_MOESM1_ESM.pdf]

# **Supplementary Information**

**FRQ-CK1 interaction determines the period of circadian rhythms in  
*Neurospora***

**Liu et al.**

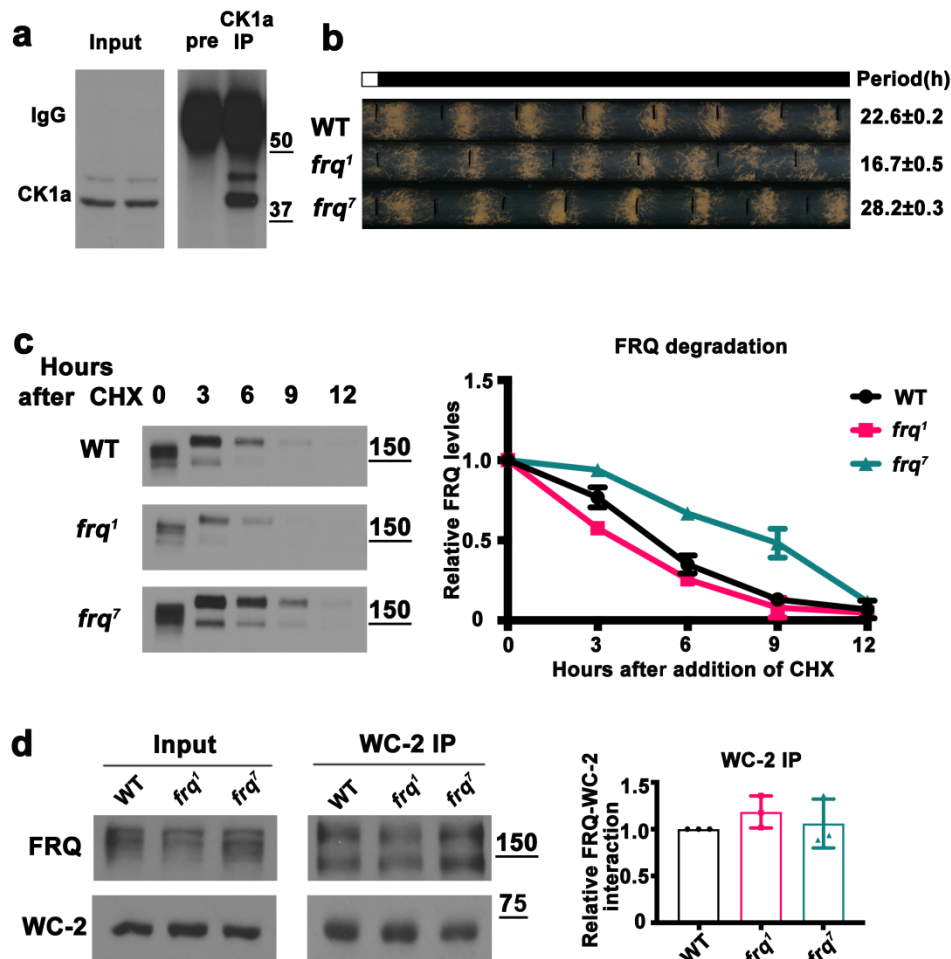

**Supplementary Figure 1. Molecular characterization of the *frq*<sup>1</sup> and *frq*<sup>7</sup> strains.** (a) Analysis of proteins precipitated from *Neurospora* extract with CK1a antibody demonstrates recognition of endogenous CK1a protein. (b) Race tube assay showing period changes and of *frq*<sup>1</sup> and *frq*<sup>7</sup> strains. Error bars are standard errors of means (n=4). (c) Western blot analysis for FRQ in the *frq*<sup>1</sup> and *frq*<sup>7</sup> strains at indicated times after CHX addition. The densitometric analysis is shown on the right (n=3). (d) Immunoprecipitation of WC-2 in wild-type, *frq*<sup>1</sup>, and *frq*<sup>7</sup> extracts. The densitometric analysis in the wild-type strain is shown on the right. Error bars are standard deviations (n=3). Source data are provided as a Source Data file.

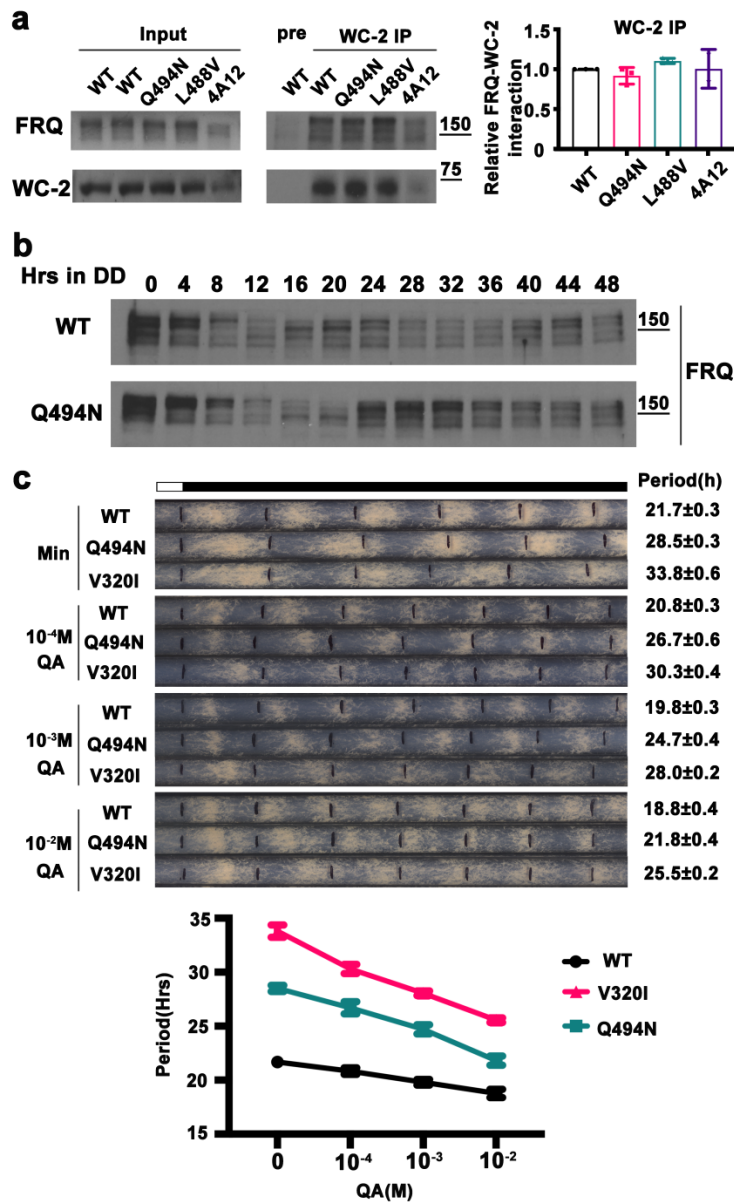

**Supplementary Figure 2. FRQ-CK1a interaction dynamics are important for circadian period length.** (a) WC-2 immunoprecipitation assays of the indicated strains. The densitometric analysis quantifying the amount of FRQ relative to the amount in the wild-type strain is shown on the right. Error bars indicate standard deviations (n=3). (b) Western blot analysis showing the circadian rhythms of FRQ expression in constant darkness in the indicated strains. (c) Race tube assays showing circadian conidiation rhythms in the indicated strains after induction of CK1a by QA at different concentrations. Quantification of period length of the strains are shown below. Errors are standard errors of means (n=4). Source data are provided as a Source Data file.

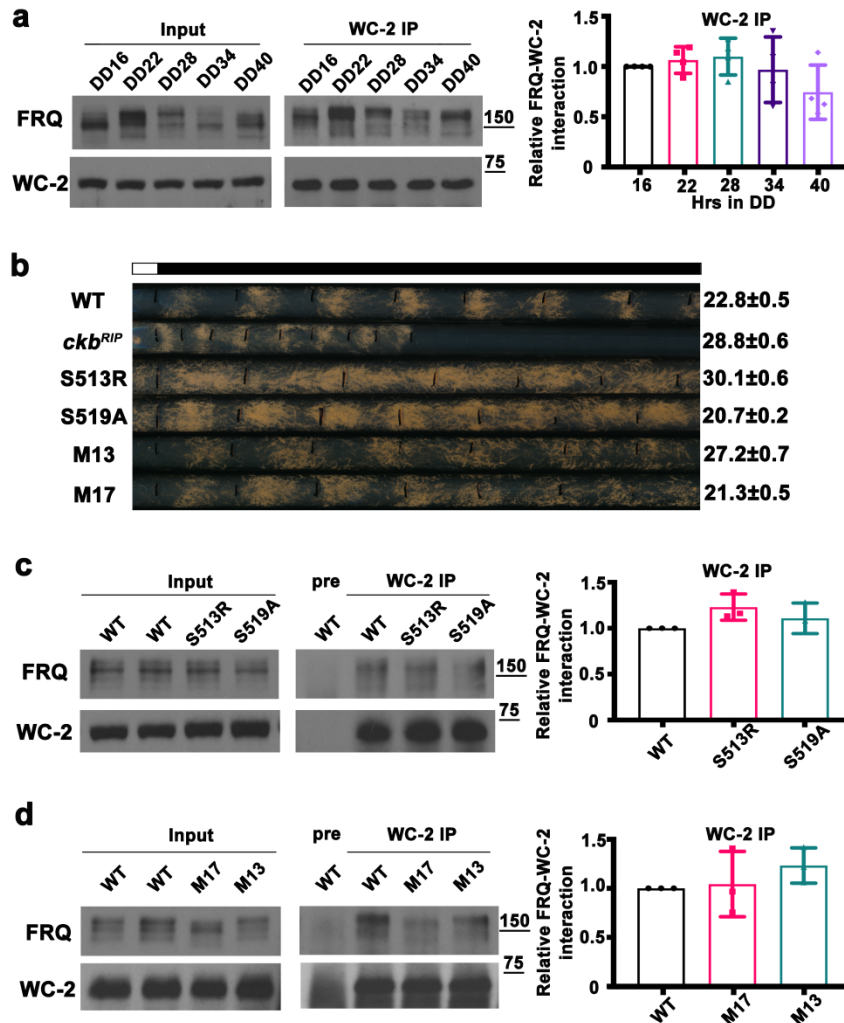

**Supplementary Figure 3. FRQ-WC interaction was not affected in period mutants.** (a) WC-2 immunoprecipitation assays of the indicated strains grown in LL. The densitometric analysis quantifying the amount of FRQ relative to the amount in the wild-type strain is shown on the right. Error bars indicate standard deviations (n=3). (b) Race tube assay showing circadian conidiation rhythms of *ckb<sup>RIP</sup>*, S513R, S519A, M13, and M17 strains. Errors are standard errors of means (n=5). (c-d) WC-2 immunoprecipitation assays of S513R, S519A, M13, and M17 strains. The densitometric analysis quantifying the amount of FRQ relative to the amount in the wild-type strain is shown on the right. Error bars indicate standard deviations (n=3). Source data are provided as a Source Data file.

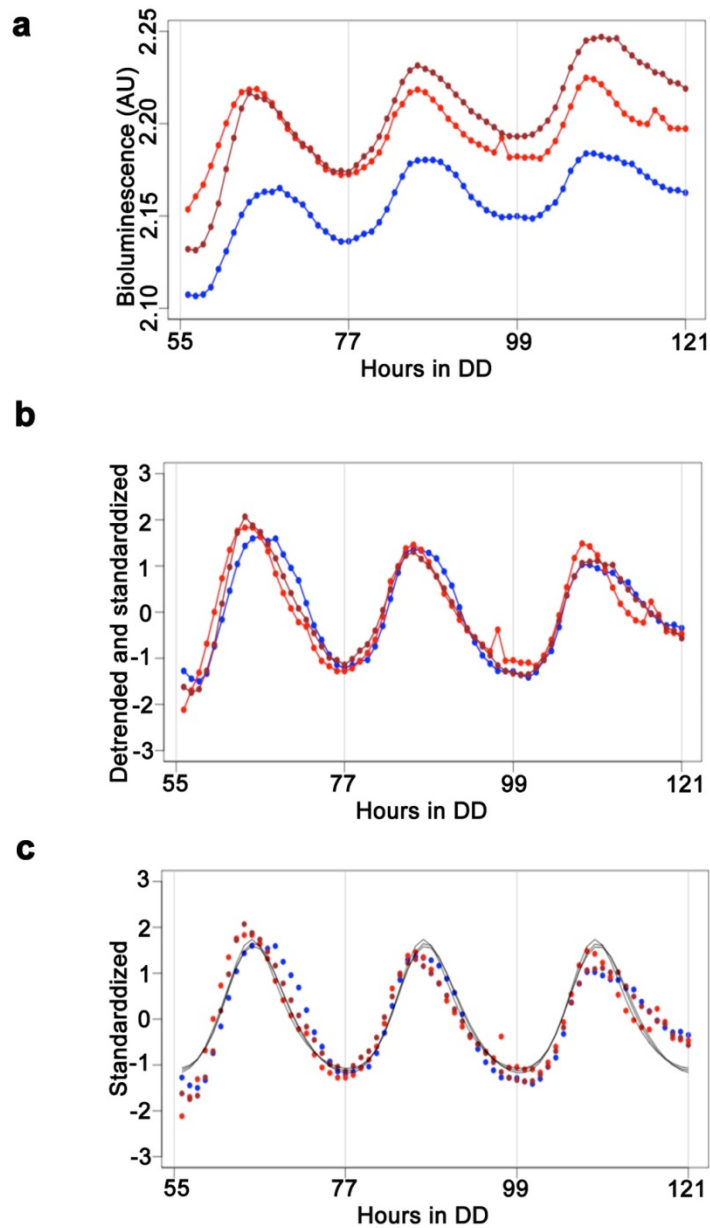

**Supplementary Figure 4. Fitting of the experimental data prior to parameter estimation and parameter estimation based on three independent experiments.** (a) Bioluminescence measurements from a luciferase reporter fused to the *frq* promoter ( $n=3$ ). (b) The estimated trend is removed from the original expression level, then standardized. (c) Oscillation profiles from 3 parameter sets (solid curves) overlaid on the standardized expression level of *frq* gene expression measured by *frq*-luciferase reporter (dots). Three curves corresponding to the 3 parameter sets drawn from the MCMC chain have identical shapes.

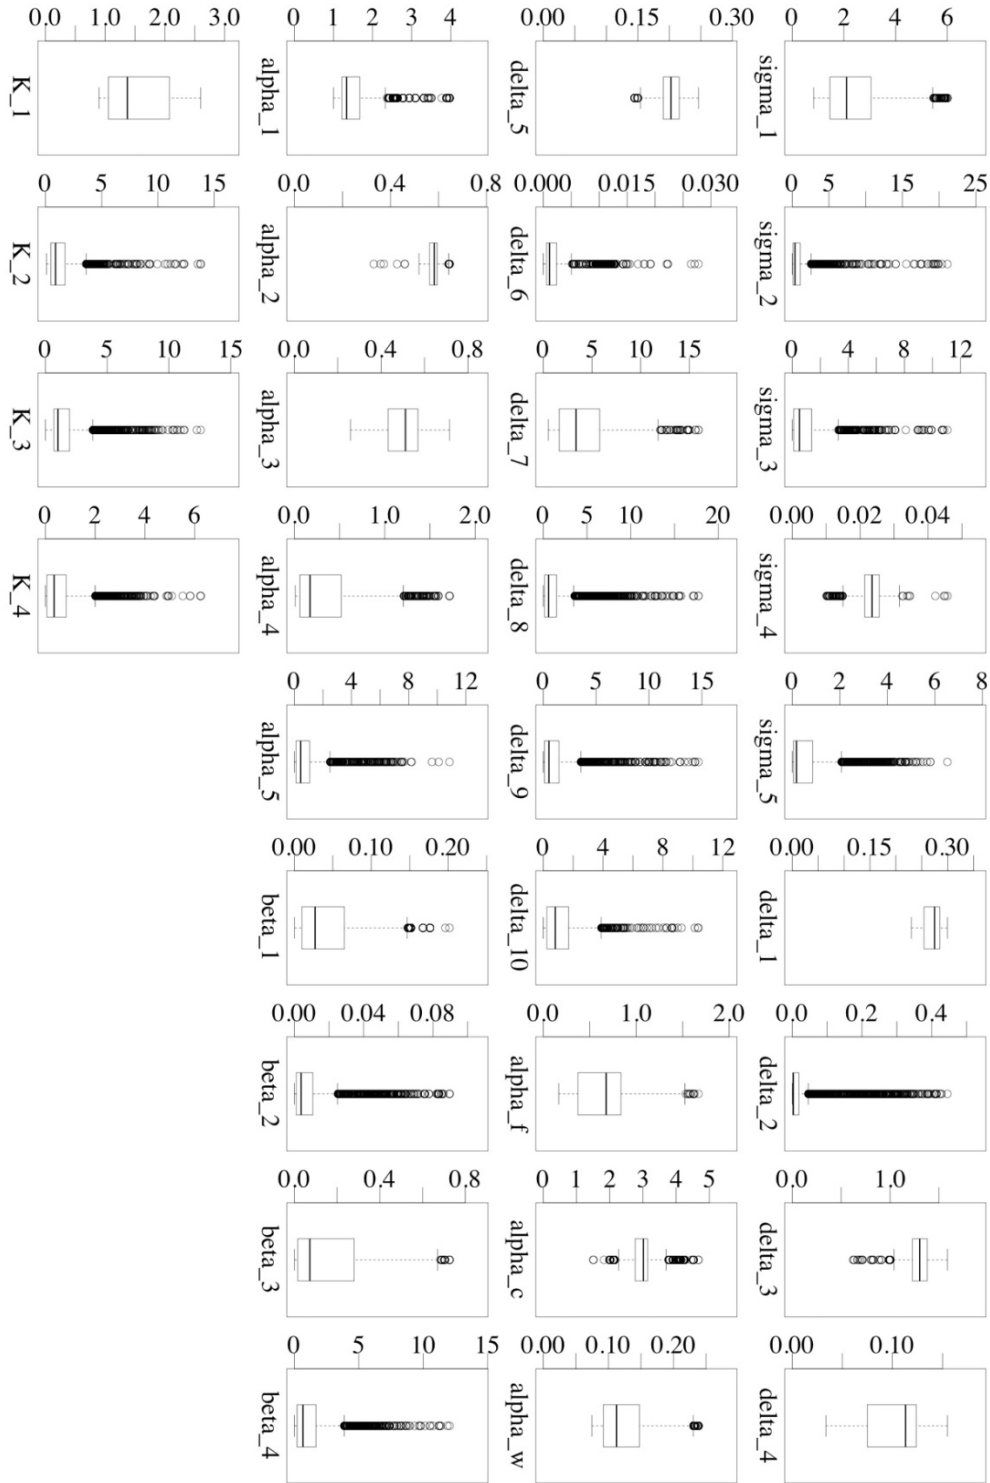

**Supplementary Figure 5. Marginal distribution of 31 model parameters drawn from a MCMC chain with 4,000 iterations.** Y-axis show numerical values of each parameter in their respective units as described in Table S1.

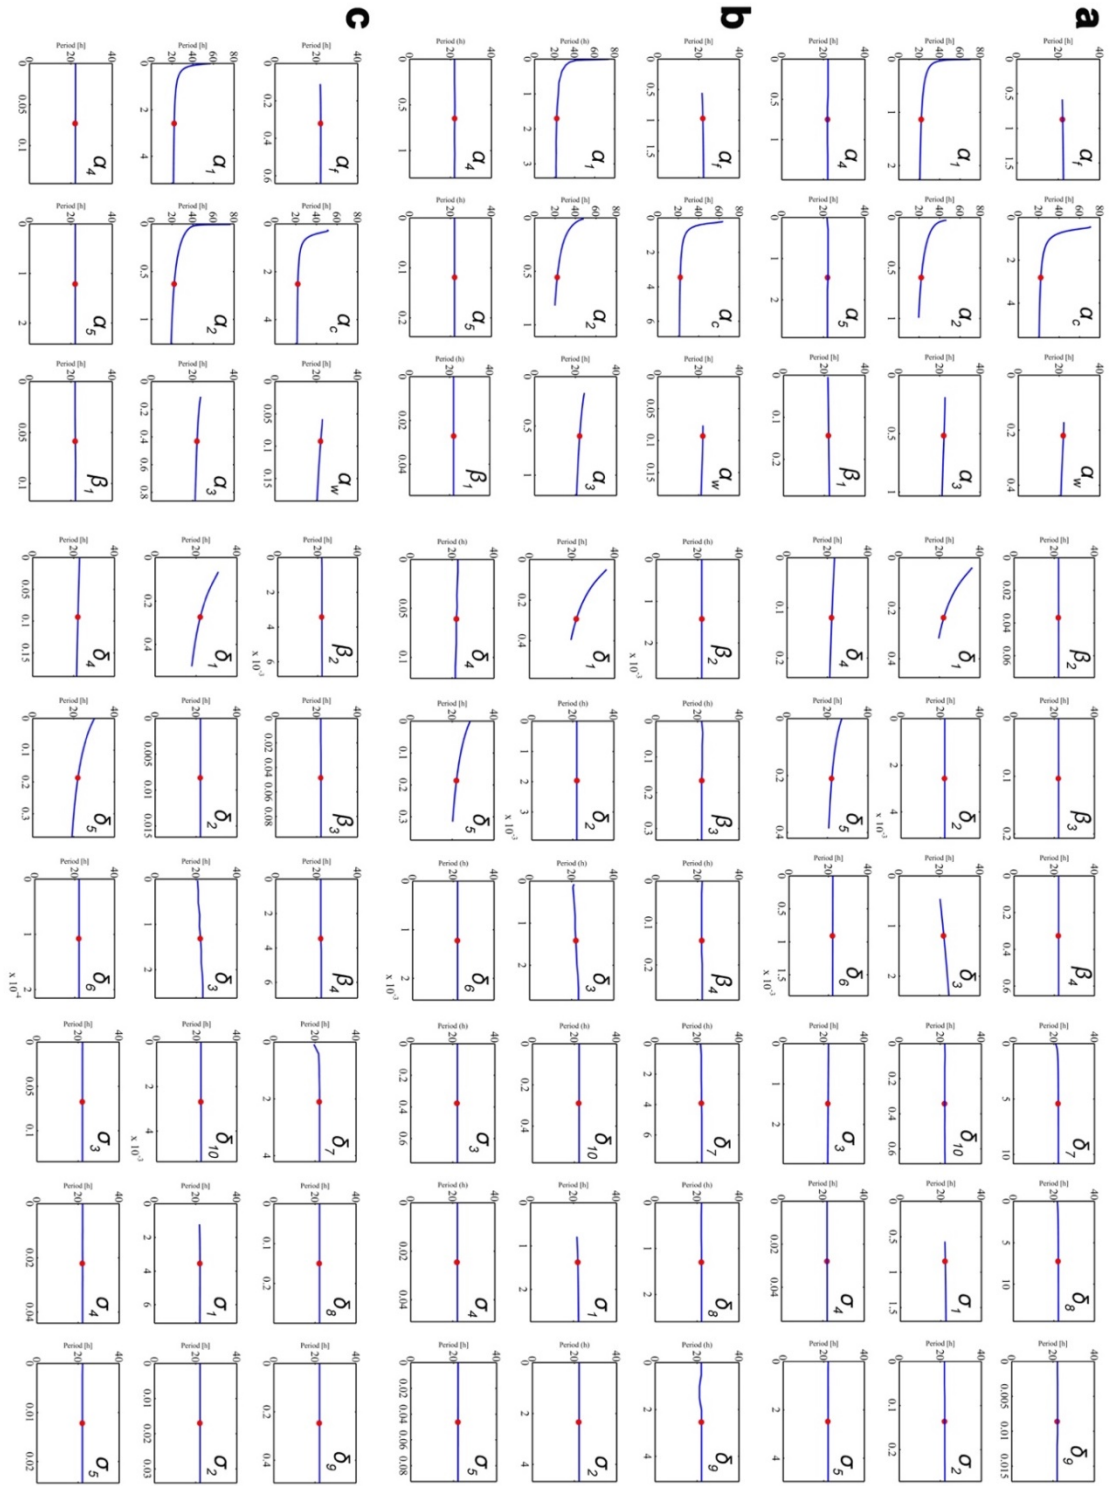

**Supplementary Figure 6. One-parameter bifurcation analyses for three sets of parameters.**

(a-c) One-parameter bifurcation analysis for parameters from (a) set 1, (b) set 2, and (c) set 3.

Parameter values are given in Table S1.

**Supplementary Table 1.** Values, units, and descriptions of parameters used in mathematical modeling.

| Parameters    | Set 1       | Set 2       | Set 3       | Units               | Description                                           |
|---------------|-------------|-------------|-------------|---------------------|-------------------------------------------------------|
| $\alpha_f$    | 0.870878612 | 0.969599683 | 0.320611907 | $h^{-1}$            | Rate of synthesis of FRQ                              |
| $\alpha_c$    | 2.804900175 | 3.447119953 | 2.511403244 | $a.u.h^{-1}$        | Rate of synthesis of CK1                              |
| $\alpha_w$    | 0.219706956 | 0.093004735 | 0.092404435 | $a.u.h^{-1}$        | Rate of synthesis of $WCC_a$                          |
| $\alpha_1$    | 1.132575798 | 1.701458277 | 2.585217081 | $(a.u.)^{-1}h^{-1}$ | Rate of association between FRQ and CK1               |
| $\alpha_2$    | 0.593871864 | 0.555047615 | 0.629418704 | $h^{-1}$            | Rate of phosphorylation of FRQ:CK1 complex            |
| $\alpha_3$    | 0.516499619 | 0.603515817 | 0.431117198 | $(a.u.)^{-1}h^{-1}$ | Rate of association between FRQ:CK1 and $WCC_a$       |
| $\alpha_4$    | 0.748625166 | 0.649159884 | 0.073014737 | $h^{-1}$            | Rate of phosphorylation of FRQ:CK1: $WCC_a$           |
| $\alpha_5$    | 1.458350375 | 0.118755742 | 1.21208905  | $h^{-1}$            | Rate of dissociation between FRQ, CK1, and $WCC_i$    |
| $\beta_1$     | 0.143704179 | 0.027155705 | 0.058611284 | $h^{-1}$            | Rate of dissociation between FRQ and CK1              |
| $\beta_2$     | 0.036725581 | 0.001423979 | 0.003421335 | $h^{-1}$            | Rate of dephosphorylation of FRQ:CK1 complex          |
| $\beta_3$     | 0.103946717 | 0.166316173 | 0.048470728 | $h^{-1}$            | Rate of dissociation between FRQ:CK1 and $WCC_a$      |
| $\beta_4$     | 0.326428518 | 0.141742623 | 3.457019544 | $h^{-1}$            | Rate of dephosphorylation of FRQ:CK1: $WCC_a$         |
| $\delta_1$    | 0.237607683 | 0.29278174  | 0.273954198 | $h^{-1}$            | Rate of degradation of <i>frq</i> mRNA                |
| $\delta_2$    | 0.002567856 | 0.00196427  | 0.008292166 | $h^{-1}$            | Rate of degradation of FRQ                            |
| $\delta_3$    | 1.195795179 | 1.412607585 | 1.312519195 | $h^{-1}$            | Rate of degradation of CK1                            |
| $\delta_4$    | 0.119505827 | 0.060763961 | 0.093592661 | $h^{-1}$            | Rate of degradation of FRQ:CK1 complex                |
| $\delta_5$    | 0.210581592 | 0.186619481 | 0.186823146 | $h^{-1}$            | Rate of degradation of phosphorylated FRQ:CK1 complex |
| $\delta_6$    | 0.000908462 | 0.001222758 | 0.000107667 | $h^{-1}$            | Rate of degradation of active WCC                     |
| $\delta_7$    | 5.4230748   | 3.912102529 | 2.103746067 | $h^{-1}$            | Rate of degradation of FRQ:CK1: $WCC_a$ complex       |
| $\delta_8$    | 7.25089941  | 1.298127664 | 0.149940849 | $h^{-1}$            | Rate of degradation of FRQ:CK1: $WCC_i$ complex       |
| $\delta_9$    | 0.008603263 | 2.542465713 | 0.247220332 | $h^{-1}$            | Rate of degradation of phosphorylated FRQ             |
| $\delta_{10}$ | 0.342629474 | 0.289466702 | 0.002680827 | $h^{-1}$            | Rate of degradation of                                |



|            |             |             |             |                                      |                                                                           |
|------------|-------------|-------------|-------------|--------------------------------------|---------------------------------------------------------------------------|
|            |             |             |             |                                      | inactive WCC                                                              |
| $\sigma_1$ | 0.846786705 | 1.373112679 | 3.548666189 | a.u.h <sup>-1</sup>                  | Transcription rate of <i>frq</i> mRNA by WCC <sub>a</sub>                 |
| $\sigma_2$ | 0.136243263 | 2.340420329 | 0.017017841 | a.u.h <sup>-1</sup>                  | Transcription rate of <i>frq</i> mRNA by FRQ:CK1:WCC <sub>a</sub> complex |
| $\sigma_3$ | 1.489300149 | 0.376526076 | 0.067346364 | (a.u.) <sup>-1</sup> h <sup>-1</sup> | Activation rate of autocatalysis                                          |
| $\sigma_4$ | 0.027945648 | 0.024530964 | 0.02205903  | h <sup>-1</sup>                      | Rate of dissociation of FRQ:CK1 promoted by FRQ:CK1:WCC <sub>i</sub>      |
| $\sigma_5$ | 2.482894159 | 0.046222158 | 0.012197585 | h <sup>-1</sup>                      | Rate of synthesis of active WCC                                           |
| $K_1$      | 2.220963035 | 1.362713222 | 0.963857481 | a.u.                                 | Threshold of critical concentration for transcription                     |
| $K_2$      | 3.073835756 | 1.515614232 | 0.562165757 | a.u.                                 | Threshold of critical concentration for transcription                     |
| $K_3$      | 0.719011473 | 1.145317596 | 3.064323196 | a.u.                                 | Threshold of critical concentration for association                       |
| $K_4$      | 0.180716273 | 0.941876131 | 0.014560894 | a.u.                                 | Threshold of critical concentration for dissociation                      |
| $m$        | 5           | 5           | 5           |                                      | Hill coefficient                                                          |
| $n$        | 5           | 5           | 5           |                                      | Hill coefficient                                                          |
| $\ell$     | 5           | 5           | 5           |                                      | Hill coefficient                                                          |
| $s$        | 5           | 5           | 5           |                                      | Hill coefficient                                                          |

**Supplementary Table 2.** Ranking of the period sensitivity of each parameter for 3 parameter sets.

|                   | <b>Set 1</b><br>$P_0=22.0994$ |                   | <b>Set 2</b><br>$P_0=22.1484$ |                   | <b>Set 3</b><br>$P_0=22.13$ |
|-------------------|-------------------------------|-------------------|-------------------------------|-------------------|-----------------------------|
| <b>Parameters</b> | $\phi$                        | <b>Parameters</b> | $\phi$                        | <b>Parameters</b> | $\phi$                      |
| $\alpha_1$        | unbounded                     | $\alpha_2$        | 2.5985                        | $\alpha_1$        | unbounded                   |
| $\alpha_c$        | 1.9259                        | $\alpha_1$        | 1.6178                        | $\alpha_c$        | 2.2381                      |
| $\alpha_2$        | 1.2638                        | $\alpha_c$        | 1.3554                        | $\alpha_2$        | 1.2196                      |
| $\delta_1$        | 0.7539                        | $\delta_1$        | 0.5869                        | $\delta_1$        | 0.7433                      |
| $\delta_5$        | 0.3788                        | $\delta_5$        | 0.5266                        | $\delta_5$        | 0.2906                      |
| $\alpha_3$        | 0.2130                        | $\delta_7$        | 0.1645                        | $\delta_3$        | 0.1970                      |
| $\delta_3$        | 0.1444                        | $\delta_4$        | 0.1444                        | $\delta_4$        | 0.1057                      |
| $\delta_4$        | 0.0644                        | $\delta_3$        | 0.1142                        | $\alpha_w$        | 0.0655                      |
| $\delta_9$        | 0.0453                        | $\alpha_w$        | 0.1135                        | $\alpha_3$        | 0.0646                      |
| $\alpha_f$        | 0.0377                        | $\alpha_3$        | 0.1117                        | $\delta_7$        | 0.0637                      |
| $\delta_7$        | 0.0272                        | $\sigma_1$        | 0.0117                        | $\beta_1$         | 0.0325                      |
| $\alpha_w$        | 0.0265                        | $\alpha_5$        | 0.0110                        | $\sigma_1$        | 0.0249                      |
| $\beta_3$         | 0.0223                        | $\beta_1$         | 0.0110                        | $\alpha_f$        | 0.0243                      |
| $\beta_4$         | 0.0110                        | $\beta_4$         | 0.0110                        | $\delta_8$        | 0.0239                      |
| $\alpha_4$        | 0.0077                        | $\alpha_f$        | 0.0098                        | $\alpha_5$        | 0.0218                      |
| $\delta_8$        | 0.0055                        | $\beta_2$         | 0.0066                        | $\sigma_3$        | 0.0154                      |
| $\alpha_5$        | 0                             | $\alpha_4$        | 0.0044                        | $\alpha_4$        | 0.0110                      |
| $\beta_1$         | 0                             | $\beta_3$         | 0.0044                        | $\delta_9$        | 0.0088                      |
| $\beta_2$         | 0                             | $\delta_{10}$     | 0.0033                        | $\sigma_2$        | 0.0077                      |
| $\delta_2$        | 0                             | $\sigma_5$        | 0.0044                        | $\delta_{10}$     | 0.0055                      |
| $\delta_6$        | 0                             | $\sigma_3$        | 0.0011                        | $\delta_6$        | 0.0045                      |
| $\delta_{10}$     | 0                             | $\sigma_4$        | 0.0011                        | $\beta_2$         | 0.0027                      |
| $\sigma_1$        | 0                             | $\delta_6$        | 0                             | $\sigma_5$        | 0.0023                      |
| $\sigma_2$        | 0                             | $\delta_2$        | 0                             | $\sigma_4$        | 0.0022                      |
| $\sigma_3$        | 0                             | $\delta_8$        | 0                             | $\beta_3$         | 0.0014                      |
| $\sigma_4$        | 0                             | $\delta_9$        | 0                             | $\beta_4$         | 0.0005                      |
| $\sigma_5$        | 0                             | $\sigma_2$        | 0                             | $\delta_2$        | 0.0005                      |

**Supplementary Table 3.** List of primers used in this work.

| Primer names         | Sequences                                 |
|----------------------|-------------------------------------------|
| FRQ-L488V-ApoI-F     | GTGCTTTGTAACTGGCCCAGCTG                   |
| FRQ-L488-N491-R      | ATTGAAATTCACCCAGCCTTCCGC                  |
| FRQ-C490G-ApoI-F     | CTGCTTGGTAACTGGCCCAGCTG                   |
| FRQ-N491E-F          | CTGCTTTGTGAACTGGCCCAGCTG                  |
| FRQ-L492M-PvuII-F    | ATGGCCCAACTGCACATGGTTAAC                  |
| FRQ-L492M-L495V-R    | GTTACAAAGCAGATTGAGATACACCCAGCC            |
| FRQ-A493V-PvuII-F    | CTGGTCCAACCTGCACATGGTTAAC                 |
| FRQ-Q494N-PvuII-F    | CTGGCCAACCTGCACATGGTTAAC                  |
| FRQ-V319I-F          | ATTGTCCGACGCTTGGAGCAACTGTTC               |
| FRQ-V319I-PvuII-R    | CAGCTGCTTCTTCTCCTTGTCGGTCATG              |
| FRQ-V320L-R322K-R    | AACCAGCTGCTTCTTCTCCTTGTCGGTC              |
| FRQ-V320L-F          | CTGCGACGCTTGGAGCAACTGTTCACC               |
| FRQ-V320I-F2         | ATCCGACGCTTGGAGCAACTGTTCACC               |
| FRQ-R321K-F2         | GTCAAGCGCTTGGAGCAACTGTTCACC               |
| FRQ-R322K-F2         | GTCCGAAAATTGGAGCAACTGTTCACC               |
| FRQ-L323M-PvuII-F    | ATGGAGCAGCTGTTCACCGGAAAGATC               |
| FRQ-L323M-Q325N-R    | GCGTCGGACAACCAGCTTCTTCTTCTC               |
| FRQ-E324D-PvuII-F    | TTGGACCAGCTGTTCACCGGAAAGATC               |
| FRQ-Q325N-XhoI-F     | CTCGAGGGACTGTTCACCGGAAAGATC               |
| <i>frq</i> T7 5UTR F | TAATACGACTCACTATAGGGGAAGCCTGCGATGCTACTCAC |
| <i>frq</i> T7 5UTR R | CATCGCATCCACTTCGCACAC                     |
| <i>frq</i> C-box F   | GTCAAGCTCGTACCCACATC                      |
| <i>frq</i> C-box R   | CCGAAAGTATCTTGAGCCTCC                     |
| GST-CK1-F EcoR I     | GGAATTCATGACTACCATGGATCTCCGC              |
| GST-CK1-R Sma I      | TCCCCGGGTCACATCCTGTCGCTGCCACC             |
